# Supplementary material for: The THO/TREX Complex Active in Alternative Splicing Mediates Plant Responses to Salicylic Acid and Jasmonic Acid
Source: MDPI journal article supplement (doi:10.3390/ijms222212197), 2021-11-11
Supplement: s1 [file s1]

## SUPPLEMENTAL MATERIALS

# The THO/TREX Complex Active in Alternative Splicing Mediates Plant Responses to Salicylic Acid and Jasmonic Acid

Nengxu Sun <sup>†</sup>, Xiangjiu Kong <sup>†</sup>, Yueyan Liu, Tingting Gong, Xiaoyong Gu and Lijing Liu <sup>\*</sup>

The Key Laboratory of Plant Development and Environmental Adaptation Biology, Ministry of Education, School of Life Sciences, Shandong University, 266237 Qingdao, China; 201932352@mail.sdu.edu.cn (N.S.); xjkong0528@sdu.edu.cn (X.K.); liuyy9702@163.com (Y.L.); alightt@163.com (T.G.); guxy18@sdu.edu.cn (X.G.)

<sup>\*</sup> Correspondence: ljliu@sdu.edu.cn

<sup>†</sup> These authors contributed equally to the article.

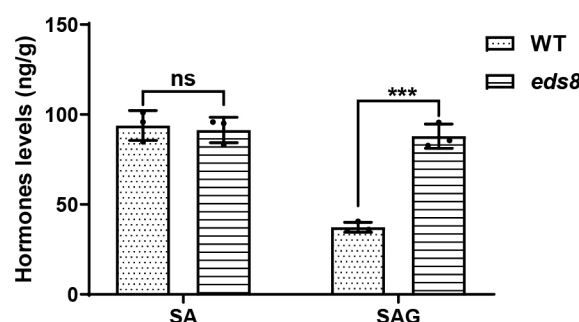

**Figure S1.** The levels of SA and SAG in WT and *eds8* mutant. The third and fourth true leaves of three-week-old plants were collected. The levels of SA and SAG were measured. Significant difference was detected by student *t*-test. Data are shown as mean  $\pm$  SD (*n* = 3). \*\*\*, *p* < 0.001; ns, no significant difference.

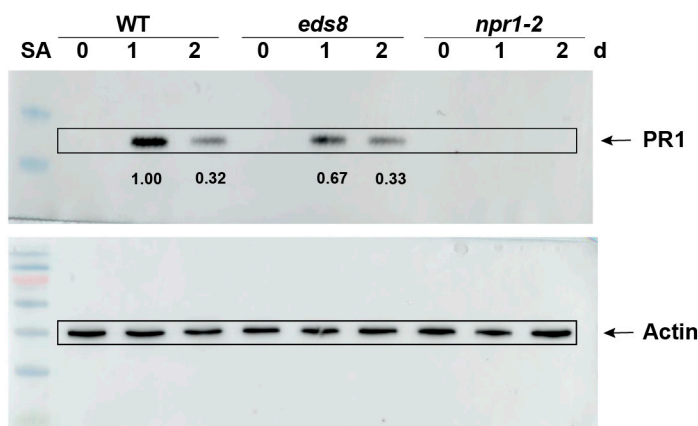

**Figure S2.** The full scan data for protein levels of PR1 in WT, *eds8* and *npr1* mutants after SA treatment.

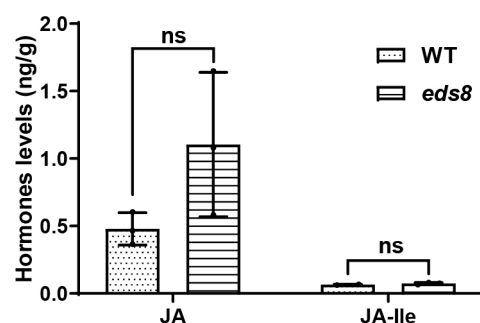

**Figure S3.** The levels of JA and JA-Ile in WT and *eds8* mutant. The third and fourth true leaves of three-week-old plants were collected. The levels of JA-Ile and JA were measured. Significant difference was detected by student *t*-test. Data are shown as mean  $\pm$  SD ( $n = 3$ ). ns, no significant difference.

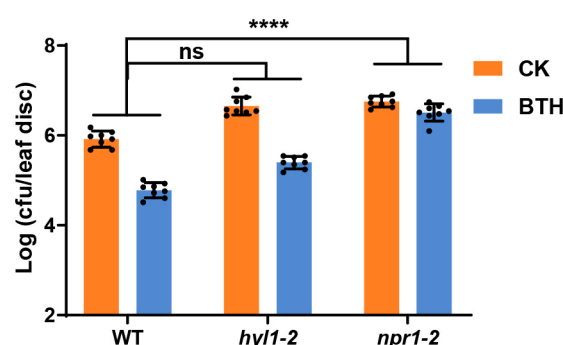

**Figure S4.** The BTH induced defense in WT, *hyl* and *npr1* mutants. Three-week-old plants were sprayed with BTH or CK ( $H_2O$ ) one day before pathogen infiltration ( $OD_{600} = 0.001$ ), and pathogen growth was determined three days later. Significant difference was detected by two-way ANOVA. Data are shown as mean  $\pm$  SD ( $n = 8$ ). The experiment was repeated three times with similar results. \*\*\*\*,  $p < 0.0001$ ; ns, no significant difference.

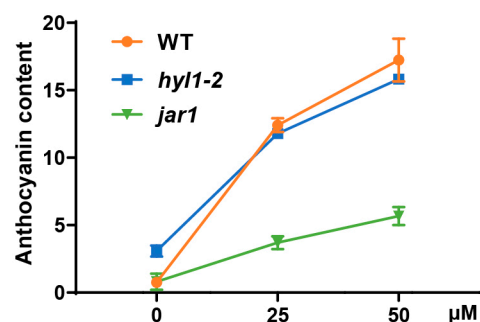

**Figure S5.** The JA induced anthocyanin accumulation assay in WT, *hyl* and *jar1* mutants. Seeds were sowed onto 1/2 MS plates with different concentration of JA, and the anthocyanin accumulation was determined 14 days later. The experiment was repeated three times with similar results.

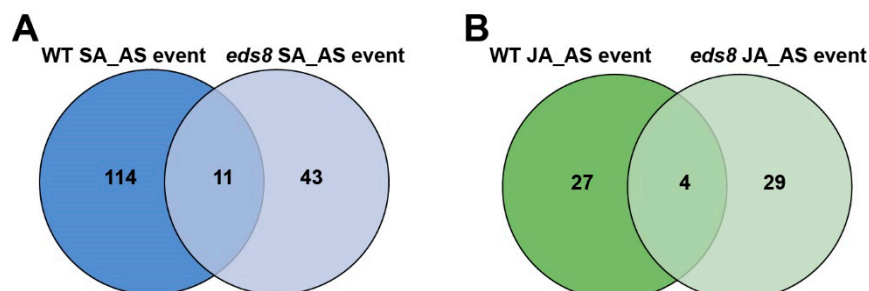

**Figure S6.** EDS8 influences the SA and JA induced changes on alternative splicing (AS) events. The Venn diagrams of different AS events induced by SA (A) and JA (B) in WT and *eds8* mutant.

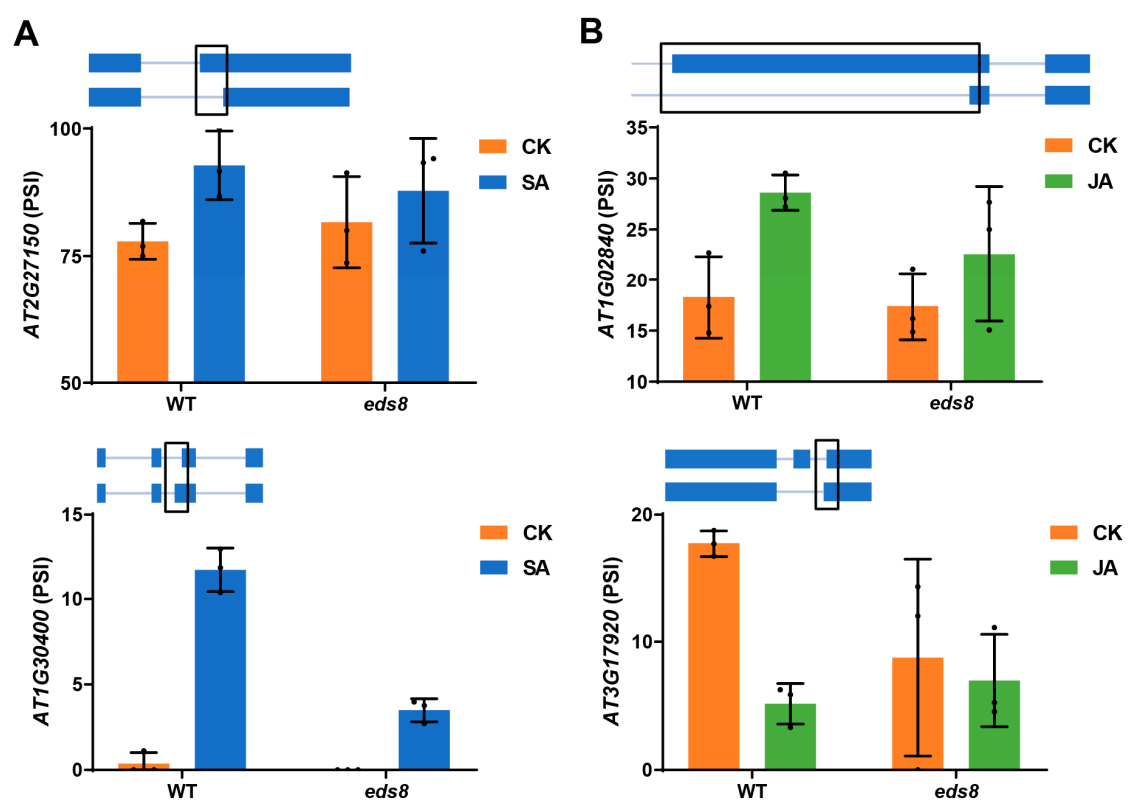

**Figure S7.** Representative EDS8 dependent DAS events regulated by SA and JA. **(A)** Representative EDS8 dependent DAS events (Event Region NC003071.7:11602079-11602429 of *At2g27150* and NC003070.9:10731068-10731226 of *At1g30400*) regulated by SA. **(B)** Representative EDS8 dependent DAS events (Event Region NC003070.9:628470-629287 of *At1g02840* and NC003074.8:6137696-6137982 of *At3g17920*) regulated by JA. Exons are represented as blue boxes, and introns as blue line. PSI, percent spliced in.

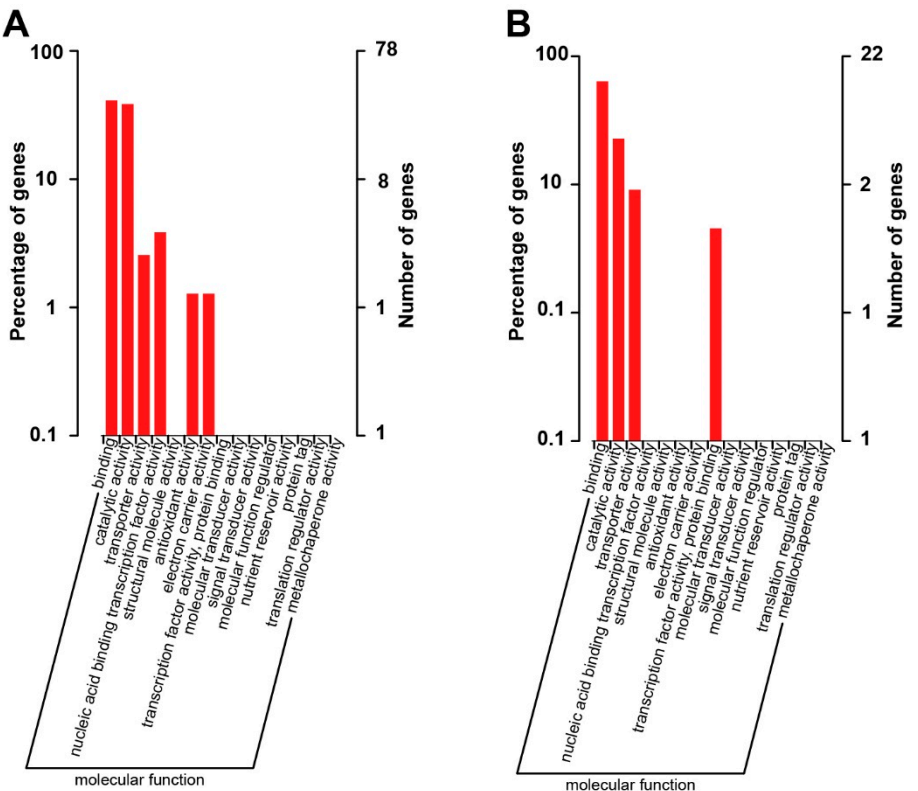

**Figure S8.** Go terms of the EDS8 dependent SA and JA induced DAS genes. **(A)** GO terms of EDS8 dependent SA induced DAS genes. **(B)** GO terms of EDS8 dependent JA induced DAS genes.

**Table S1.** The AS events in different samples used for full length mRNA sequencing.

| AS type<br>Sample | IR  | ES  | AD  | AA  | MEE |
|-------------------|-----|-----|-----|-----|-----|
| WT CK             | 516 | 138 | 171 | 333 | 8   |
| WT SA             | 560 | 169 | 202 | 382 | 8   |
| WT JA             | 544 | 140 | 171 | 324 | 7   |
| eds8 CK           | 555 | 172 | 224 | 364 | 8   |
| eds8 SA           | 652 | 219 | 270 | 417 | 11  |
| eds8 JA           | 538 | 166 | 199 | 359 | 8   |

**Table S2.** The primers used in this study.

| Primer                          | Sequence (5'-3')          |
|---------------------------------|---------------------------|
| <i>UBQ5qPCR<sub>Fw</sub></i>    | GTAAACGTAGGTGAGTCC        |
| <i>UBQ5qPCR<sub>Rev</sub></i>   | GACGCTTCATCTCGTCC         |
| <i>PR1qPCR<sub>Fw</sub></i>     | CTCATACACTCTGGTGGG        |
| <i>PR1qPCR<sub>Rev</sub></i>    | TTGGCACATCCGAGTC          |
| <i>PDF1.2qPCR<sub>Fw</sub></i>  | TTGCTGCTTTCGACGCA         |
| <i>PDF1.2qPCR<sub>Rev</sub></i> | TGTCCCACTTGGCTTCTCG       |
| <i>AtActin2-1F<sub>w</sub></i>  | GGCGATGAAGCTCAATCCAAACG   |
| <i>AtActin2-1R<sub>ev</sub></i> | GGTCACGACCAGCAAGATCAAGACG |
| <i>BcActin-1F<sub>w</sub></i>   | TCCAAGCGTGGTATTCTTACCC    |
| <i>BcActin-1R<sub>ev</sub></i>  | TGGTGCTACACGAAGTTCGTTG    |
